# Supplementary material
Source: Springer Nature journal article supplement (https://www.springermedizin.de/resource/supplementary/12889_2010_2555_MOESM2_ESM.pdf/9486410)

Level of physical activity by ethnicity

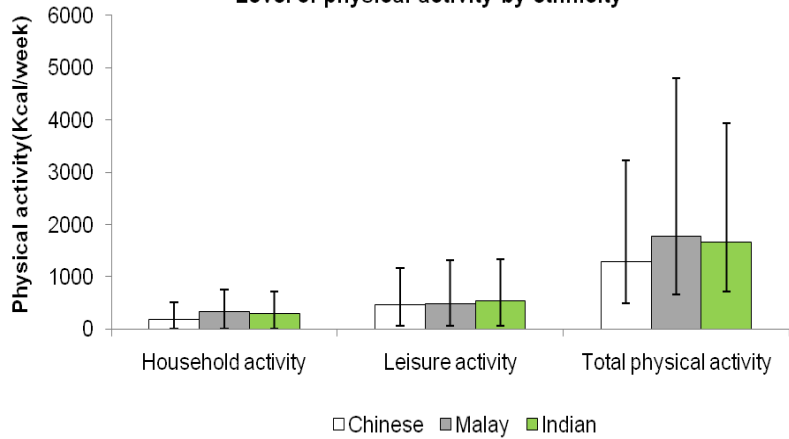

Level of physical activity by socioeconomic status

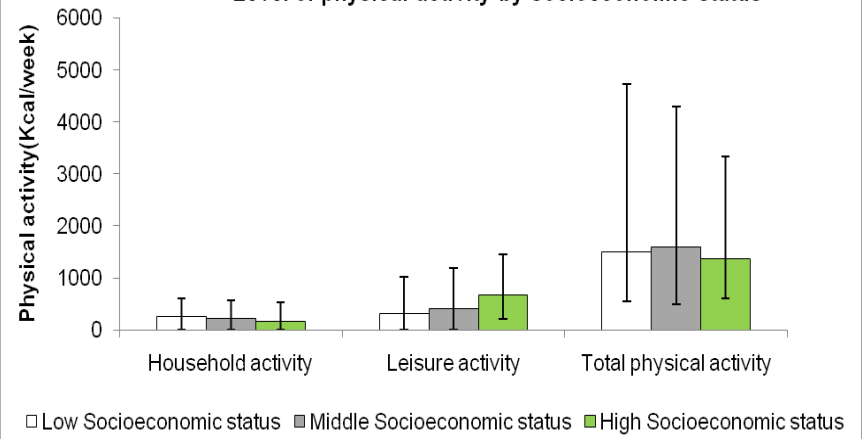

Level of physical activity by age group

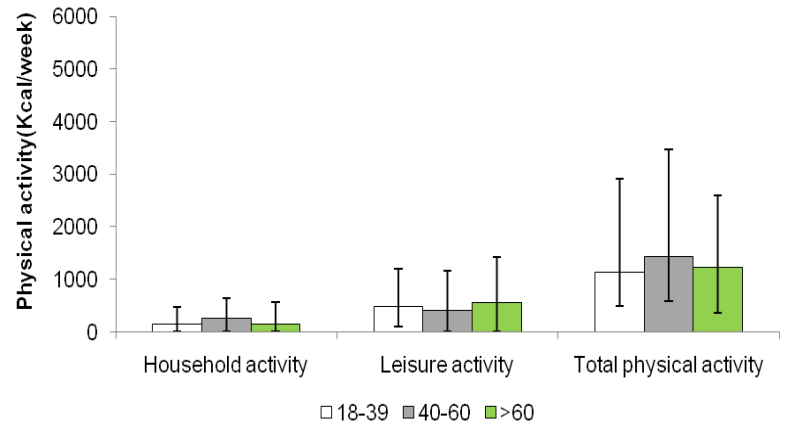

Level of physical activity by gender

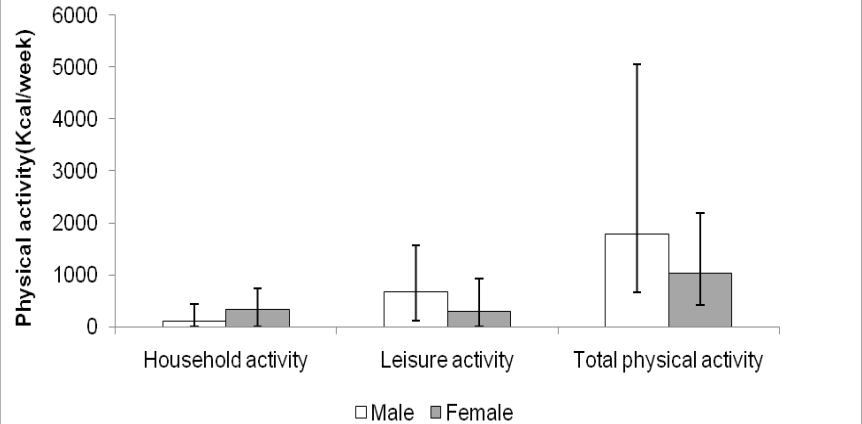

Supplement: MOESM2 [file 9486410]
